# Supplementary material
Source: publisher figshare collection journal article supplement (https://sage.figshare.com/ndownloader/files/24154595)
Supplement: Supplementary file 1 [file 24154595]

**Appendix Table A1** Gross morphology scores<sup>17</sup>

|                                                 | 4 points       | 3 points          | 2 points  | 1 point   | 0 point |
|-------------------------------------------------|----------------|-------------------|-----------|-----------|---------|
| Coverage<br>(% fill)                            | > 75%          | 51% - 75%         | 25% - 50% | < 25%     | bare    |
| Neo-cartilage color<br>(% yellow/brown/reddish) | normal/whitish | < 25%             | 25% - 50% | 51% - 75% | > 75%   |
| Defect margin<br>(% circumference)              | invisible      | <25%              | 25% - 50% | 51% - 75% | >75%    |
| Surface smoothness<br>(% irregular)             | normal         | smooth but raised | 25% - 50% | 51% - 75% | > 75%   |

**Appendix Table A2** Histology scoring system<sup>9</sup>

| Evaluation Items                                                       | Category                                                         | Points |
|------------------------------------------------------------------------|------------------------------------------------------------------|--------|
| 1. Percent filling with neo-formed tissue                              | 76–100%                                                          | 3      |
|                                                                        | 51–75%                                                           | 2      |
|                                                                        | 26–50%                                                           | 1      |
|                                                                        | 0–25%                                                            | 0      |
| 2. Percent filling with neo-formed tissue in subchondral bone          | 76–100%                                                          | 3      |
|                                                                        | 51–75%                                                           | 2      |
|                                                                        | 26–50%                                                           | 1      |
|                                                                        | 0–25%                                                            | 0      |
| 3. Subchondral bone morphology                                         | Normal, trabecular bone                                          | 4      |
|                                                                        | Trabecular, with some compact bone                               | 3      |
|                                                                        | Compact bone                                                     | 2      |
|                                                                        | Compact bone and fibrous tissue                                  | 1      |
|                                                                        | Only fibrous tissue or no tissue                                 | 0      |
| 4. Extent of neo-tissue bonding with adjacent bone in subchondral bone | Complete on both edges                                           | 3      |
|                                                                        | Complete on one edge                                             | 2      |
|                                                                        | Partial on both edges                                            | 1      |
|                                                                        | Without continuity on either edge                                | 0      |
| 5. Morphology of neo-formed surface tissue                             | Mainly hyaline cartilage (>75%)                                  | 8      |
|                                                                        | Hyaline cartilage mixed with fibrocartilage (50–75%)             | 6      |
|                                                                        | Mainly Fibrocartilage (>75%)                                     | 4      |
|                                                                        | Mainly fibrous tissue (spherical cell morphology <75% of cells)  | 2      |
|                                                                        | No tissue                                                        | 0      |
| 6. Thickness of neo-formed cartilage                                   | Similar to the surrounding cartilage                             | 3      |
|                                                                        | Greater than surrounding cartilage                               | 2      |
|                                                                        | Less than the surrounding cartilage                              | 1      |
|                                                                        | No cartilage                                                     | 0      |
| 7. Joint surface regularity                                            | Smooth, intact surface                                           | 3      |
|                                                                        | Surface fissures (<25% neo-surface thickness)                    | 2      |
|                                                                        | Deep fissures (25–99% neo-surface thickness)                     | 1      |
|                                                                        | Complete disruption of the neo-surface                           | 0      |
| 8. Chondrocyte clustering                                              | None at all                                                      | 3      |
|                                                                        | Less than 25% of chondrocytes                                    | 2      |
|                                                                        | 25–100% chondrocytes                                             | 1      |
|                                                                        | No chondrocytes present (no cartilage)                           | 0      |
| 9. Chondrocyte and GAGs content of neo-cartilage                       | Normal cellularity with normal Alcian blue staining              | 3      |
|                                                                        | Normal cellularity with moderate Alcian blue staining            | 2      |
|                                                                        | Obviously less cells with poor Alcian blue staining              | 1      |
|                                                                        | Few cells with no or little Alcian blue staining or no cartilage | 0      |
| 10. Chondrocyte and GAGs content of adjacent cartilage                 | Normal cellularity with normal Alcian blue staining              | 3      |
|                                                                        | Normal cellularity with moderate Alcian blue staining            | 2      |
|                                                                        | Obviously less cells with poor Alcian blue staining              | 1      |
|                                                                        | Few cells with no or little Alcian blue staining or no cartilage | 0      |
| 11. Inflammatory response in the reparative site                       | Normal tissue (<5% inflammatory cells)                           | 3      |
|                                                                        | Mild inflammation (5–20% inflammatory cells)                     | 2      |
|                                                                        | Moderate inflammation (21–50% inflammatory cells)                | 1      |
|                                                                        | Severe (>50% inflammatory cells)                                 | 0      |
| Total score                                                            |                                                                  | 39     |

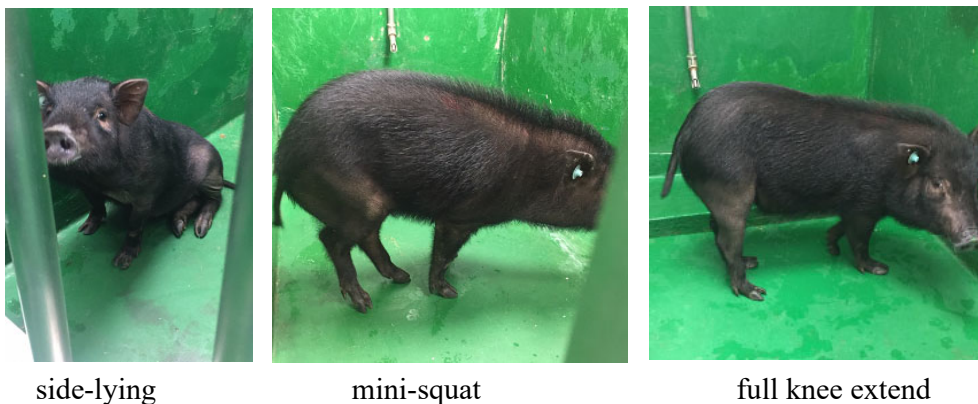

**Appendix Figure A1.** Porcine health. All minipigs were able to stand within 3 days from side-lying and mini-squat (partial weight-bearing) to full knee extend (full weight-bearing) after surgery.

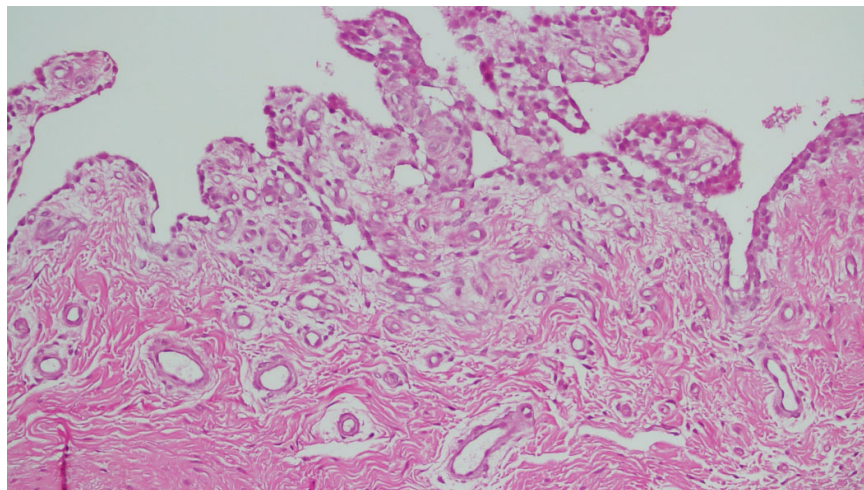

**Appendix Figure A2.** SED group knee showing synovial membrane hyperplasia.
